# Supplementary material for: Molecular diagnoses in the congenital malformations caused by ciliopathies cohort of the 100,000 Genomes Project
Source: PubMed Central journal article supplement (PMC9340050; doi:10.1136/jmedgenet-2021-108065), 2021-10-29
Supplement: jmedgenet-2021-108065supp001.pdf [file jmedgenet-2021-108065supp001.pdf]

## Supplementary tables

Supplementary Table 1. Summary of genetic diagnosis rates of various ciliopathies using different next generation sequencing approaches.

| Patient group                                                                                       | Sequencing approach                                                | Genetic diagnosis rate | Year | Reference |
|-----------------------------------------------------------------------------------------------------|--------------------------------------------------------------------|------------------------|------|-----------|
| 10 families with NPHP                                                                               | homozygosity mapping + WES                                         | 70%                    | 2014 | (1)       |
| Syndromic ciliopathies                                                                              | Gene panel, SNP genotyping, targeted sequencing of candidate genes | 62%                    | 2015 | (2)       |
| 375 families with JBTS                                                                              | Gene panel                                                         | 32%                    | 2015 | (3)       |
| Ciliopathy patients in a large rare disease cohort                                                  | WES                                                                | 44%                    | 2015 | (4)       |
| 79 suspected NPHP cases                                                                             | WES                                                                | 40.5%                  | 2016 | (5)       |
| 43 patients with NPHP who had had the 5 most common NPHP genes excluded as a cause of their disease | Gene panel                                                         | 16.3%                  | 2016 | (6)       |
| 26 patients with JBTS or MKS                                                                        | WES with split read mapping                                        | 46%                    | 2016 | (7)       |
| 6 BBS patients                                                                                      | WES                                                                | 67%                    | 2017 | (8)       |
| 100 families with JBTS                                                                              | Gene panel sequencing + WES                                        | 94%                    | 2017 | (9)       |
| 56 families in whom PCD was suspected                                                               | WES                                                                | 68%                    | 2020 | (10)      |
| 125 families with ciliopathies                                                                      | WGS                                                                | 87%                    | 2020 | (11)      |
| 29 families with skeletal ciliopathies                                                              | WGS + structural variant screening + RNA analyses                  | 90%                    | 2021 | (12)      |

Supplementary Table 2. Diagnostic grade “green” genes in Rare Multisystem Ciliopathy Disorders PanelApp panel V1.139

| Gene name     | Mode of inheritance | Associated phenotypes | Ensembl Id      |
|---------------|---------------------|-----------------------|-----------------|
| <b>AHI1</b>   | Biallelic           | JBTS                  | ENSG00000135541 |
| <b>ALMS1</b>  | Biallelic           | BBS, Alström          | ENSG00000116127 |
| <b>ANKS6</b>  | Biallelic           | PKD, NPHP             | ENSG00000165138 |
| <b>ARL13B</b> | Biallelic           | JBTS                  | ENSG00000169379 |
| <b>ARL6</b>   | Biallelic           | BBS                   | ENSG00000113966 |
| <b>ARMC9</b>  | Biallelic           | JBTS                  | ENSG00000135931 |
| <b>B9D2</b>   | Biallelic           | JBTS, MKS             | ENSG00000123810 |
| <b>BBS1</b>   | Biallelic           | BBS                   | ENSG00000174483 |
| <b>BBS10</b>  | Biallelic           | BBS                   | ENSG00000179941 |

|                 |             |                                          |                 |
|-----------------|-------------|------------------------------------------|-----------------|
| <b>BBS12</b>    | Biallelic   | BBS                                      | ENSG00000181004 |
| <b>BBS2</b>     | Biallelic   | BBS                                      | ENSG00000125124 |
| <b>BBS4</b>     | Biallelic   | BBS                                      | ENSG00000140463 |
| <b>BBS5</b>     | Biallelic   | BBS                                      | ENSG00000163093 |
| <b>BBS7</b>     | Biallelic   | BBS                                      | ENSG00000138686 |
| <b>BBS9</b>     | Biallelic   | BBS                                      | ENSG00000122507 |
| <b>C21orf2</b>  | Biallelic   | JATD, Spondylometaphyseal dysplasia, IRD | ENSG00000160226 |
| <b>C2CD3</b>    | Biallelic   | SRPS, JATD, OFD                          | ENSG00000168014 |
| <b>C5orf42</b>  | Biallelic   | JBTS, OFD                                | ENSG00000197603 |
| <b>CC2D2A</b>   | Biallelic   | JBTS, MKS, COACH                         | ENSG00000048342 |
| <b>CENPF</b>    | Biallelic   | Stromme                                  | ENSG00000117724 |
| <b>CEP104</b>   | Biallelic   | JBTS                                     | ENSG00000116198 |
| <b>CEP120</b>   | Biallelic   | SRTD, CED, JATD                          | ENSG00000168944 |
| <b>CEP164</b>   | Biallelic   | NPHP, SLS                                | ENSG00000110274 |
| <b>CEP290</b>   | Biallelic   | JBTS, MKS, COACH, SLS                    | ENSG00000198707 |
| <b>CEP41</b>    | Biallelic   | JBTS                                     | ENSG00000106477 |
| <b>CEP83</b>    | Biallelic   | NPHP                                     | ENSG00000173588 |
| <b>CRB2</b>     | Biallelic   | PKD with ventriculomegaly                | ENSG00000148204 |
| <b>CSPP1</b>    | Biallelic   | JBTS, MKS                                | ENSG00000104218 |
| <b>DDX59</b>    | Biallelic   | OFD                                      | ENSG00000118197 |
| <b>DHCR7</b>    | Biallelic   | SLO                                      | ENSG00000172893 |
| <b>DYNC2H1</b>  | Biallelic   | SRTD, CED, JATD                          | ENSG00000187240 |
| <b>DYNC2LI1</b> | Biallelic   | SRTD                                     | ENSG00000138036 |
| <b>EVC</b>      | Biallelic   | EVC, WAD                                 | ENSG00000072840 |
| <b>EVC2</b>     | Biallelic   | EVC, WAD                                 | ENSG00000173040 |
| <b>GLI3</b>     | Monoallelic | JBTS, SLS                                | ENSG00000106571 |
| <b>HNF1B</b>    | Monoallelic | PKD, NPHP                                | ENSG00000275410 |
| <b>HYLS1</b>    | Biallelic   | JBTS, Hydroletharus syndrome             | ENSG00000198331 |
| <b>ICK</b>      | Biallelic   | Endocrine-cerebro-osteodysplasia         | ENSG00000112144 |
| <b>IFT122</b>   | Biallelic   | CED                                      | ENSG00000163913 |
| <b>IFT140</b>   | Biallelic   | SRTD, JATD, Mainzer-Saldino              | ENSG00000187535 |
| <b>IFT172</b>   | Biallelic   | RP, SRTD, JATD, Mainzer-Saldino, SRTD    | ENSG00000138002 |
| <b>IFT27</b>    | Biallelic   | ? BBS                                    | ENSG00000100360 |
| <b>IFT43</b>    | Biallelic   | SRTD, CED, Sensenbrennar syndrome        | ENSG00000119650 |
| <b>IFT52</b>    | Biallelic   | SRTD                                     | ENSG00000101052 |
| <b>IFT74</b>    | Biallelic   | ? BBS                                    | ENSG00000096872 |
| <b>IFT80</b>    | Biallelic   | SRTD, JATD                               | ENSG00000068885 |
| <b>INPP5E</b>   | Biallelic   | JBTS                                     | ENSG00000148384 |
| <b>INVS</b>     | Biallelic   | NPHP, SLS                                | ENSG00000119509 |
| <b>IQCB1</b>    | Biallelic   | SLS                                      | ENSG00000173226 |

|                 |                           |                                                        |                 |
|-----------------|---------------------------|--------------------------------------------------------|-----------------|
| <b>KIAA0586</b> | Biallelic                 | JBTS, SRTD                                             | ENSG00000100578 |
| <b>KIAA0753</b> | Biallelic                 | OFD, SRTD, JBTS                                        | ENSG00000198920 |
| <b>KIF7</b>     | Biallelic                 | JBTS, Acrocallosal syndrome                            | ENSG00000166813 |
| <b>LZTFL1</b>   | Biallelic                 | BBS                                                    | ENSG00000163818 |
| <b>MAPKBP1</b>  | Biallelic                 | NPHP                                                   | ENSG00000137802 |
| <b>MKKS</b>     | Biallelic                 | BBS                                                    | ENSG00000125863 |
| <b>MKS1</b>     | Biallelic                 | MKS, BBS, JBTS                                         | ENSG00000011143 |
| <b>NEK1</b>     | Biallelic                 | SRTD                                                   | ENSG00000137601 |
| <b>NEK8</b>     | Biallelic                 | NPHP                                                   | ENSG00000160602 |
| <b>NPHP1</b>    | Biallelic                 | NPHP, JBTS, SLS                                        | ENSG00000144061 |
| <b>NPHP3</b>    | Biallelic                 | MKS, SLS, NPHP                                         | ENSG00000113971 |
| <b>NPHP4</b>    | Biallelic                 | NPHP, SLS                                              | ENSG00000131697 |
| <b>OFD1</b>     | X-linked                  | JBTS, OFD                                              | ENSG00000046651 |
| <b>PIBF1</b>    | Biallelic                 | JBTS                                                   | ENSG00000083535 |
| <b>PKD1</b>     | Monoallelic and biallelic | PKD                                                    | ENSG00000008710 |
| <b>PKD2</b>     | Monoallelic               | PKD                                                    | ENSG00000118762 |
| <b>PKHD1</b>    | Biallelic                 | Polycystic kidney and hepatic disease                  | ENSG00000170927 |
| <b>PMM2</b>     | Biallelic                 | Congenital disorder of glycosylation                   | ENSG00000140650 |
| <b>RPGRIP1L</b> | Biallelic                 | JBTS, MKS                                              | ENSG00000103494 |
| <b>SBDS</b>     | Biallelic                 | Skeletal ciliopathies                                  | ENSG00000126524 |
| <b>SCLT1</b>    | Biallelic                 | OFD, SLS                                               | ENSG00000151466 |
| <b>SDCCAG8</b>  | Biallelic                 | BBS, SLS                                               | ENSG00000054282 |
| <b>TCTEX1D2</b> | Biallelic                 | SRTD, JATD                                             | ENSG00000213123 |
| <b>TCTN1</b>    | Biallelic                 | JBTS                                                   | ENSG00000204852 |
| <b>TCTN2</b>    | Biallelic                 | JBTS, MKS                                              | ENSG00000168778 |
| <b>TCTN3</b>    | Biallelic                 | OFD, JBTS, MKS, Mohr-Majewski syndrome                 | ENSG00000119977 |
| <b>TMEM107</b>  | Biallelic                 | MKS, OFD, ? JBTS                                       | ENSG00000179029 |
| <b>TMEM138</b>  | Biallelic                 | JBTS                                                   | ENSG00000149483 |
| <b>TMEM216</b>  | Biallelic                 | JBTS, MKS                                              | ENSG00000187049 |
| <b>TMEM231</b>  | Biallelic                 | JBTS, MKS                                              | ENSG00000205084 |
| <b>TMEM237</b>  | Biallelic                 | JBTS                                                   | ENSG00000155755 |
| <b>TMEM67</b>   | Biallelic                 | JBTS, MKS, COACH, NPHP, Senior-Boichis syndrome, ? BBS | ENSG00000164953 |
| <b>TRAF3IP1</b> | Biallelic                 | SLS                                                    | ENSG00000204104 |
| <b>TTC21B</b>   | Biallelic                 | NPHP, SRTD, JATD                                       | ENSG00000123607 |
| <b>TTC8</b>     | Biallelic                 | BBS                                                    | ENSG00000165533 |
| <b>TXNDC15</b>  | Biallelic                 | MKS                                                    | ENSG00000113621 |
| <b>VPS13B</b>   | Biallelic                 | Cohen syndrome                                         | ENSG00000132549 |
| <b>WDPCP</b>    | Biallelic                 | MKS, ?BBS                                              | ENSG00000143951 |
| <b>WDR19</b>    | Biallelic                 | CED, SRTD, JATD, NPHP, SLS                             | ENSG00000157796 |

|                        |             |                                                                                                      |                 |
|------------------------|-------------|------------------------------------------------------------------------------------------------------|-----------------|
| <b>WDR34</b>           | Biallelic   | SRTD, JATD                                                                                           | ENSG00000119333 |
| <b>WDR35</b>           | Biallelic   | CED, SRTD                                                                                            | ENSG00000118965 |
| <b>WDR60</b>           | Biallelic   | SRTD, JATD                                                                                           | ENSG00000126870 |
| <b>ZSWIM6</b>          | Monoallelic | Acromelic frontonasal dysostosis                                                                     | ENSG00000130449 |
| <b>ISCA-37405-Loss</b> | Biallelic   | JBTS, NPHP                                                                                           |                 |
| <b>ISCA-37432-Loss</b> | Monoallelic | Renal cysts and diabetes syndrome, Autism Spectrum Disorder, Mayer-Rokitansky-Kuster-Hauser syndrome |                 |

**Abbreviations:** BBS: Bardet Biedl syndrome; CED: Cranioectodermal dysplasia; COACH: cerebellar vermis hypo/aplasia, oligophrenia, ataxia, ocular coloboma, and hepatic fibrosis; EVC: Ellis-Van-Creveld syndrome; IRD: Inherited retinal dystrophy; JATD: Jeune asphyxiating thoracic dystrophy; JBTS: Joubert syndrome; LCA: Leber's congenital amaurosis; MKS: Meckel Gruber Syndrome; NPHP: nephronophthisis; PKD: Polycystic kidney disease; RP: Retinitis Pigmentosa; SLO: Smith Lemli Optiz syndrome; SLS: Senior Loken syndrome; SRPS: Short rib polydactyly syndrome; SRTD: Short rib thoracic dystrophy; WAD: Weyers acrofacial dysostosis

Supplementary Table 2. Candidate gene list provided alongside Rare Multisystem Super Ciliopathy panel v4.91 for Extract\_hets Python script.

| Gene symbol | Source                                                                             | Ensembl Id      |
|-------------|------------------------------------------------------------------------------------|-----------------|
| ACVR2B      | PanelApp RMCD red gene                                                             | ENSG00000114739 |
| ADAMTS10    | Ciliopathy candidate identified through local research team experimental screen(s) | ENSG00000142303 |
| ADAMTS9     | Ciliopathy candidate identified through local research team experimental screen(s) | ENSG00000163638 |
| ADCY3       | On SCGS V1 list                                                                    | ENSG00000138031 |
| ADGRV1      | PanelApp RMCD red gene + SCGS V1 list                                              | ENSG00000164199 |
| AIPL1       | PanelApp RMCD red gene + SCGS V1 list                                              | ENSG00000129221 |
| AK7         | On SCGS V1 list                                                                    | ENSG00000140057 |
| AK8         | On SCGS V1 list                                                                    | ENSG00000165695 |
| ARF4        | On SCGS V1 list                                                                    | ENSG00000168374 |
| ARL3        | On SCGS V1 list                                                                    | ENSG00000138175 |
| ARMC4       | PanelApp RMCD red gene                                                             | ENSG00000169126 |
| ASAP1       | On SCGS V1 list                                                                    | ENSG00000153317 |
| ATXN10      | PanelApp RMCD red gene + SCGS V1 list                                              | ENSG00000130638 |
| B9D1        | PanelApp RMCD red gene + SCGS V1 list                                              | ENSG00000108641 |
| BBIP1       | PanelApp RMCD red gene                                                             | ENSG00000214413 |
| C21orf59    | PanelApp RMCD red gene                                                             | ENSG00000159079 |
| C2orf71     | PanelApp RMCD red gene                                                             | ENSG00000179270 |
| C8orf37     | PanelApp RMCD red gene + SCGS V1 list                                              | ENSG00000156172 |

|         |                                                                                    |                 |
|---------|------------------------------------------------------------------------------------|-----------------|
| CBY1    | On SCGS V1 list                                                                    | ENSG00000100211 |
| CCDC103 | PanelApp RMCD red gene + SCGS V1 list                                              | ENSG00000167131 |
| CCDC114 | PanelApp RMCD red gene + SCGS V1 list                                              | ENSG00000105479 |
| CCDC151 | PanelApp RMCD red gene                                                             | ENSG00000198003 |
| CCDC28B | PanelApp RMCD red gene + SCGS V1 list                                              | ENSG00000160050 |
| CCDC39  | PanelApp RMCD red gene + SCGS V1 list                                              | ENSG00000145075 |
| CCDC40  | PanelApp RMCD red gene + SCGS V1 list                                              | ENSG00000141519 |
| CCDC65  | PanelApp RMCD red gene                                                             | ENSG00000139537 |
| CCNO    | PanelApp RMCD red gene                                                             | ENSG00000152669 |
| CCP110  | On SCGS V1 list                                                                    | ENSG00000103540 |
| CDH23   | PanelApp RMCD red gene + SCGS V1 list                                              | ENSG00000107736 |
| CENPJ   | On SCGS V1 list                                                                    | ENSG00000151849 |
| CEP131  | On SCGS V1 list                                                                    | ENSG00000141577 |
| CEP135  | On SCGS V1 list                                                                    | ENSG00000174799 |
| CEP250  | On SCGS V1 list                                                                    | ENSG00000126001 |
| CEP72   | On SCGS V1 list                                                                    | ENSG00000112877 |
| CEP89   | On SCGS V1 list                                                                    | ENSG00000121289 |
| CEP97   | On SCGS V1 list                                                                    | ENSG00000182504 |
| CFAP100 | On SCGS V1 list                                                                    | ENSG00000163885 |
| CFAP43  | PanelApp RMCD red gene                                                             | ENSG00000197748 |
| CFAP44  | PanelApp RMCD red gene                                                             | ENSG00000206530 |
| CFAP45  | Ciliopathy candidate identified through local research team experimental screen(s) | ENSG00000213085 |
| CFAP53  | PanelApp RMCD red gene                                                             | ENSG00000172361 |
| CFAP57  | Ciliopathy candidate identified through local research team experimental screen(s) | ENSG00000243710 |
| CFC1    | PanelApp RMCD red gene                                                             | ENSG00000136698 |
| CFTR    | PanelApp RMCD red gene                                                             | ENSG00000001626 |
| CLDN2   | On SCGS V1 list                                                                    | ENSG00000165376 |
| CLRN1   | PanelApp RMCD red gene                                                             | ENSG00000163646 |
| CLTB    | Ciliopathy candidate identified through local research team experimental screen(s) | ENSG00000175416 |
| CLUAP1  | On SCGS V1 list                                                                    | ENSG00000103351 |
| CNGA2   | On SCGS V1 list                                                                    | ENSG00000183862 |
| CNGA4   | On SCGS V1 list                                                                    | ENSG00000132259 |
| CNGB1   | On SCGS V1 list                                                                    | ENSG00000070729 |
| CRB1    | PanelApp RMCD red gene                                                             | ENSG00000134376 |
| CRB3    | On SCGS V1 list                                                                    | ENSG00000130545 |
| CRELD1  | PanelApp RMCD red gene                                                             | ENSG00000163703 |
| CROCC   | On SCGS V1 list                                                                    | ENSG00000058453 |
| CRX     | PanelApp RMCD red gene                                                             | ENSG00000105392 |
| CTNNB1  | On SCGS V1 list                                                                    | ENSG00000168036 |

|          |                                       |                 |
|----------|---------------------------------------|-----------------|
| DCDC2    | PanelApp RMCD red gene + SCGS V1 list | ENSG00000146038 |
| DISC1    | On SCGS V1 list                       | ENSG00000162946 |
| DNAAF1   | PanelApp RMCD red gene + SCGS V1 list | ENSG00000154099 |
| DNAAF2   | PanelApp RMCD red gene + SCGS V1 list | ENSG00000165506 |
| DNAAF3   | PanelApp RMCD red gene + SCGS V1 list | ENSG00000167646 |
| DNAAF4   | PanelApp RMCD red gene                | ENSG00000256061 |
| DNAAF5   | PanelApp RMCD red gene                | ENSG00000164818 |
| DNAH1    | PanelApp RMCD red gene + SCGS V1 list | ENSG00000114841 |
| DNAH10   | On SCGS V1 list                       | ENSG00000197653 |
| DNAH11   | PanelApp RMCD red gene + SCGS V1 list | ENSG00000105877 |
| DNAH2    | On SCGS V1 list                       | ENSG00000183914 |
| DNAH5    | PanelApp RMCD red gene + SCGS V1 list | ENSG00000039139 |
| DNAH6    | On SCGS V1 list                       | ENSG00000115423 |
| DNAI1    | PanelApp RMCD red gene + SCGS V1 list | ENSG00000122735 |
| DNAI2    | PanelApp RMCD red gene + SCGS V1 list | ENSG00000171595 |
| DNAJB13  | PanelApp RMCD red gene                | ENSG00000187726 |
| DNAL1    | PanelApp RMCD red gene + SCGS V1 list | ENSG00000119661 |
| DNALI1   | On SCGS V1 list                       | ENSG00000163879 |
| DNHD1    | PanelApp RMCD red gene                | ENSG00000179532 |
| DPCD     | On SCGS V1 list                       | ENSG00000166171 |
| DPYSL2   | On SCGS V1 list                       | ENSG00000092964 |
| DRC1     | PanelApp RMCD red gene + SCGS V1 list | ENSG00000157856 |
| DRD1     | On SCGS V1 list                       | ENSG00000184845 |
| DRD2     | On SCGS V1 list                       | ENSG00000149295 |
| DRD5     | On SCGS V1 list                       | ENSG00000169676 |
| DVL1     | On SCGS V1 list                       | ENSG00000107404 |
| DYNLT1   | On SCGS V1 list                       | ENSG00000146425 |
| EFHC1    | On SCGS V1 list                       | ENSG00000096093 |
| EXOC3    | On SCGS V1 list                       | ENSG00000180104 |
| EXOC3L2  | PanelApp RMCD amber gene              | ENSG00000283632 |
| EXOC4    | On SCGS V1 list                       | ENSG00000131558 |
| EXOC5    | On SCGS V1 list                       | ENSG00000070367 |
| EXOC6    | On SCGS V1 list                       | ENSG00000138190 |
| EXOC6B   | On SCGS V1 list                       | ENSG00000144036 |
| EXOC8    | PanelApp RMCD red gene                | ENSG00000116903 |
| EZH2     | On SCGS V1 list                       | ENSG00000106462 |
| FAM149B1 | PanelApp RMCD amber gene              | ENSG00000138286 |
| FAM161A  | On SCGS V1 list                       | ENSG00000170264 |
| FBF1     | On SCGS V1 list                       | ENSG00000188878 |
| FLNA     | On SCGS V1 list                       | ENSG00000196924 |
| FOPNL    | On SCGS V1 list                       | ENSG00000133393 |

|          |                                       |                 |
|----------|---------------------------------------|-----------------|
| FOXH1    | PanelApp RMCD red gene                | ENSG00000160973 |
| FOXJ1    | On SCGS V1 list                       | ENSG00000129654 |
| FUZ      | On SCGS V1 list                       | ENSG00000010361 |
| GAS8     | PanelApp RMCD red gene + SCGS V1 list | ENSG00000141013 |
| GDF1     | PanelApp RMCD red gene                | ENSG00000130283 |
| GLI1     | On SCGS V1 list                       | ENSG00000111087 |
| GLI2     | On SCGS V1 list                       | ENSG00000074047 |
| GLIS2    | PanelApp RMCD red gene + SCGS V1 list | ENSG00000126603 |
| GPR161   | On SCGS V1 list                       | ENSG00000143147 |
| GSK3B    | On SCGS V1 list                       | ENSG00000082701 |
| GUCY2D   | PanelApp RMCD red gene                | ENSG00000132518 |
| HAP1     | On SCGS V1 list                       | ENSG00000173805 |
| HSD11B1  | On SCGS V1 list                       | ENSG00000117594 |
| HSPA8    | On SCGS V1 list                       | ENSG00000109971 |
| HSPB11   | On SCGS V1 list                       | ENSG00000081870 |
| HTR6     | On SCGS V1 list                       | ENSG00000158748 |
| HTT      | On SCGS V1 list                       | ENSG00000197386 |
| HYDIN    | PanelApp RMCD red gene + SCGS V1 list | ENSG00000157423 |
| IFT122   | On SCGS V1 list                       | ENSG00000128581 |
| IFT20    | On SCGS V1 list                       | ENSG00000109083 |
| IFT46    | On SCGS V1 list                       | ENSG00000118096 |
| IFT57    | On SCGS V1 list                       | ENSG00000114446 |
| IFT81    | PanelApp RMCD red gene + SCGS V1 list | ENSG00000122970 |
| IFT88    | On SCGS V1 list                       | ENSG00000032742 |
| IMPDH1   | PanelApp RMCD red gene                | ENSG00000106348 |
| INTU     | On SCGS V1 list                       | ENSG00000164066 |
| JADE1    | On SCGS V1 list                       | ENSG00000077684 |
| KCNJ13   | PanelApp RMCD red gene                | ENSG00000115474 |
| KIAA0556 | PanelApp RMCD red gene                | ENSG00000047578 |
| KIF14    | PanelApp RMCD red gene                | ENSG00000118193 |
| KIF17    | On SCGS V1 list                       | ENSG00000117245 |
| KIF19    | On SCGS V1 list                       | ENSG00000196169 |
| KIF24    | On SCGS V1 list                       | ENSG00000186638 |
| KIF27    | On SCGS V1 list                       | ENSG00000165115 |
| KIF3A    | On SCGS V1 list                       | ENSG00000131437 |
| KIF3B    | On SCGS V1 list                       | ENSG00000101350 |
| KIF3C    | On SCGS V1 list                       | ENSG00000084731 |
| KIF5B    | On SCGS V1 list                       | ENSG00000170759 |
| LBR      | PanelApp RMCD red gene                | ENSG00000143815 |
| LCA5     | PanelApp RMCD red gene + SCGS V1 list | ENSG00000135338 |
| LEFTY2   | PanelApp RMCD red gene                | ENSG00000143768 |
| LRAT     | PanelApp RMCD red gene                | ENSG00000121207 |



|          |                                                                                    |                 |
|----------|------------------------------------------------------------------------------------|-----------------|
| LRR6     | PanelApp RMCD red gene + SCGS V1 list                                              | ENSG00000129295 |
| LRR45    | Ciliopathy candidate identified through local research team experimental screen(s) | ENSG00000169683 |
| MAK      | On SCGS V1 list                                                                    | ENSG00000111837 |
| MAL      | On SCGS V1 list                                                                    | ENSG00000172005 |
| MAPRE1   | On SCGS V1 list                                                                    | ENSG00000101367 |
| MCHR1    | On SCGS V1 list                                                                    | ENSG00000128285 |
| MCIDAS   | PanelApp RMCD red gene                                                             | ENSG00000234602 |
| MDM1     | On SCGS V1 list                                                                    | ENSG00000111554 |
| MICAL2   | Ciliopathy candidate identified through local research team experimental screen(s) | ENSG00000133816 |
| MLF1     | On SCGS V1 list                                                                    | ENSG00000178053 |
| MNS1     | On SCGS V1 list                                                                    | ENSG00000138587 |
| MUC1     | PanelApp RMCD red gene                                                             | ENSG00000185499 |
| MYO15A   | On SCGS V1 list                                                                    | ENSG00000091536 |
| MYO7A    | PanelApp RMCD red gene + SCGS V1 list                                              | ENSG00000137474 |
| NEK2     | On SCGS V1 list                                                                    | ENSG00000117650 |
| NEK4     | On SCGS V1 list                                                                    | ENSG00000114904 |
| NGFR     | On SCGS V1 list                                                                    | ENSG00000064300 |
| NIN      | On SCGS V1 list                                                                    | ENSG00000100503 |
| NINL     | On SCGS V1 list                                                                    | ENSG00000101004 |
| NKX2-5   | PanelApp RMCD red gene                                                             | ENSG00000183072 |
| NME5     | On SCGS V1 list                                                                    | ENSG00000112981 |
| NME7     | On SCGS V1 list                                                                    | ENSG00000143156 |
| NME8     | PanelApp RMCD red gene + SCGS V1 list                                              | ENSG00000086288 |
| NODAL    | PanelApp RMCD red gene                                                             | ENSG00000156574 |
| NOTO     | On SCGS V1 list                                                                    | ENSG00000214513 |
| NUP214   | On SCGS V1 list                                                                    | ENSG00000126883 |
| NUP35    | On SCGS V1 list                                                                    | ENSG00000163002 |
| NUP37    | On SCGS V1 list                                                                    | ENSG00000075188 |
| NUP62    | On SCGS V1 list                                                                    | ENSG00000213024 |
| NUP93    | On SCGS V1 list                                                                    | ENSG00000102900 |
| OCRL     | PanelApp RMCD red gene + SCGS V1 list                                              | ENSG00000122126 |
| ODF2     | On SCGS V1 list                                                                    | ENSG00000136811 |
| ORC1     | On SCGS V1 list                                                                    | ENSG00000085840 |
| PACRG    | On SCGS V1 list                                                                    | ENSG00000112530 |
| PAFAH1B1 | On SCGS V1 list                                                                    | ENSG00000007168 |
| PARD3    | On SCGS V1 list                                                                    | ENSG00000148498 |
| PARD6A   | On SCGS V1 list                                                                    | ENSG00000102981 |
| PCDH15   | PanelApp RMCD red gene + SCGS V1 list                                              | ENSG00000150275 |
| PCM1     | On SCGS V1 list                                                                    | ENSG00000078674 |
| PDE6D    | PanelApp RMCD red gene + SCGS V1 list                                              | ENSG00000156973 |



|           |                                                                                    |                 |
|-----------|------------------------------------------------------------------------------------|-----------------|
| PDZD7     | On SCGS V1 list                                                                    | ENSG00000186862 |
| PKD1L1    | On SCGS V1 list                                                                    | ENSG00000158683 |
| PLK1      | On SCGS V1 list                                                                    | ENSG00000166851 |
| POC1A     | PanelApp RMCD red gene + SCGS V1 list                                              | ENSG00000164087 |
| POC1B     | PanelApp RMCD amber gene                                                           | ENSG00000139323 |
| PPP3CC    | Ciliopathy candidate identified through local research team experimental screen(s) | ENSG00000120910 |
| PRKCSH    | PanelApp RMCD red gene                                                             | ENSG00000130175 |
| PTCH1     | On SCGS V1 list                                                                    | ENSG00000185920 |
| PTPDC1    | On SCGS V1 list                                                                    | ENSG00000158079 |
| RAB11A    | On SCGS V1 list                                                                    | ENSG00000103769 |
| RAB11FIP3 | On SCGS V1 list                                                                    | ENSG00000090565 |
| RAB17     | On SCGS V1 list                                                                    | ENSG00000124839 |
| RAB23     | On SCGS V1 list                                                                    | ENSG00000112210 |
| RAB3IP    | On SCGS V1 list                                                                    | ENSG00000127328 |
| RAB8A     | On SCGS V1 list                                                                    | ENSG00000167461 |
| RAN       | On SCGS V1 list                                                                    | ENSG00000132341 |
| RANBP1    | On SCGS V1 list                                                                    | ENSG00000099901 |
| RD3       | PanelApp RMCD red gene                                                             | ENSG00000198570 |
| RDH12     | PanelApp RMCD red gene                                                             | ENSG00000139988 |
| RFX3      | On SCGS V1 list                                                                    | ENSG00000080298 |
| RILPL1    | On SCGS V1 list                                                                    | ENSG00000188026 |
| RILPL2    | On SCGS V1 list                                                                    | ENSG00000150977 |
| ROPN1L    | On SCGS V1 list                                                                    | ENSG00000145491 |
| RP1       | On SCGS V1 list                                                                    | ENSG00000104237 |
| RP2       | On SCGS V1 list                                                                    | ENSG00000102218 |
| RPE65     | PanelApp RMCD red gene                                                             | ENSG00000116745 |
| RPGR      | PanelApp RMCD red gene + SCGS V1 list                                              | ENSG00000156313 |
| RPGRIP1   | PanelApp RMCD red gene + SCGS V1 list                                              | ENSG00000092200 |
| RSPH1     | PanelApp RMCD red gene + SCGS V1 list                                              | ENSG00000160188 |
| RSPH3     | On SCGS V1 list                                                                    | ENSG00000130363 |
| RSPH4A    | PanelApp RMCD red gene + SCGS V1 list                                              | ENSG00000111834 |
| RSPH9     | PanelApp RMCD red gene + SCGS V1 list                                              | ENSG00000172426 |
| RTTN      | On SCGS V1 list                                                                    | ENSG00000176225 |
| SASS6     | On SCGS V1 list                                                                    | ENSG00000156876 |
| SCNN1A    | PanelApp RMCD red gene                                                             | ENSG00000111319 |
| SCNN1B    | PanelApp RMCD red gene                                                             | ENSG00000168447 |
| SCNN1G    | PanelApp RMCD red gene                                                             | ENSG00000166828 |
| SEC63     | PanelApp RMCD red gene                                                             | ENSG00000025796 |
| SEPT2     | On SCGS V1 list                                                                    | ENSG00000168385 |
| SEPT7     | On SCGS V1 list                                                                    | ENSG00000122545 |
| SHH       | On SCGS V1 list                                                                    | ENSG00000164690 |

|          |                                                                                    |                 |
|----------|------------------------------------------------------------------------------------|-----------------|
| SLC47A2  | On SCGS V1 list                                                                    | ENSG00000180638 |
| SMCR8    | Ciliopathy candidate identified through local research team experimental screen(s) | ENSG00000283741 |
| SMO      | On SCGS V1 list                                                                    | ENSG00000128602 |
| SNAP25   | On SCGS V1 list                                                                    | ENSG00000132639 |
| SNX10    | On SCGS V1 list                                                                    | ENSG00000086300 |
| SNX17    | On SCGS V1 list                                                                    | ENSG00000115234 |
| SPA17    | On SCGS V1 list                                                                    | ENSG00000064199 |
| SPAG1    | PanelApp RMCD red gene                                                             | ENSG00000104450 |
| SPAG16   | On SCGS V1 list                                                                    | ENSG00000144451 |
| SPAG17   | On SCGS V1 list                                                                    | ENSG00000155761 |
| SPAG6    | On SCGS V1 list                                                                    | ENSG00000077327 |
| SPATA7   | PanelApp RMCD red gene + SCGS V1 list                                              | ENSG00000042317 |
| SPEF2    | On SCGS V1 list                                                                    | ENSG00000152582 |
| SPTBN4   | Ciliopathy candidate identified through local research team experimental screen(s) | ENSG00000160460 |
| SSNA1    | On SCGS V1 list                                                                    | ENSG00000176101 |
| SSTR3    | On SCGS V1 list                                                                    | ENSG00000278195 |
| STIL     | On SCGS V1 list                                                                    | ENSG00000123473 |
| STK36    | On SCGS V1 list                                                                    | ENSG00000163482 |
| STK38L   | On SCGS V1 list                                                                    | ENSG00000211455 |
| STOML3   | On SCGS V1 list                                                                    | ENSG00000133115 |
| STX3     | On SCGS V1 list                                                                    | ENSG00000166900 |
| SUFU     | PanelApp RMCD amber gene + SCGS V1 list                                            | ENSG00000107882 |
| SYNE2    | On SCGS V1 list                                                                    | ENSG00000054654 |
| TAPT1    | PanelApp RMCD red gene                                                             | ENSG00000169762 |
| TBC1D30  | On SCGS V1 list                                                                    | ENSG00000111490 |
| TBC1D32  | PanelApp RMCD red gene                                                             | ENSG00000146350 |
| TBC1D7   | On SCGS V1 list                                                                    | ENSG00000145979 |
| TEKT2    | On SCGS V1 list                                                                    | ENSG00000092850 |
| TEKT4    | On SCGS V1 list                                                                    | ENSG00000163060 |
| TEKT5    | On SCGS V1 list                                                                    | ENSG00000153060 |
| TEX12    | Ciliopathy candidate identified through local research team experimental screen(s) | ENSG00000150783 |
| TNPO1    | On SCGS V1 list                                                                    | ENSG00000083312 |
| TOPORS   | PanelApp RMCD red gene + SCGS V1 list                                              | ENSG00000197579 |
| TPPP2    | On SCGS V1 list                                                                    | ENSG00000179636 |
| TRAPPC10 | On SCGS V1 list                                                                    | ENSG00000160218 |
| TRAPPC3  | On SCGS V1 list                                                                    | ENSG00000054116 |
| TRAPPC9  | On SCGS V1 list                                                                    | ENSG00000167632 |
| TRIM32   | PanelApp RMCD red gene + SCGS V1 list                                              | ENSG00000119401 |
| TRIP11   | On SCGS V1 list                                                                    | ENSG00000100815 |

|         |                                                                                    |                 |
|---------|------------------------------------------------------------------------------------|-----------------|
| TSC1    | PanelApp RMCD red gene                                                             | ENSG00000165699 |
| TSC2    | PanelApp RMCD red gene                                                             | ENSG00000103197 |
| TTBK2   | PanelApp RMCD red gene + SCGS V1 list                                              | ENSG00000128881 |
| TTC12   | On SCGS V1 list                                                                    | ENSG00000149292 |
| TTC26   | On SCGS V1 list                                                                    | ENSG00000105948 |
| TTC29   | On SCGS V1 list                                                                    | ENSG00000137473 |
| TTC30A  | On SCGS V1 list                                                                    | ENSG00000197557 |
| TTC30B  | On SCGS V1 list                                                                    | ENSG00000196659 |
| TTK     | On SCGS V1 list                                                                    | ENSG00000112742 |
| TTLL3   | On SCGS V1 list                                                                    | ENSG00000214021 |
| TTLL6   | On SCGS V1 list                                                                    | ENSG00000170703 |
| TTLL9   | On SCGS V1 list                                                                    | ENSG00000131044 |
| TUBA1A  | On SCGS V1 list                                                                    | ENSG00000167552 |
| TUBA1C  | On SCGS V1 list                                                                    | ENSG00000167553 |
| TUBA4A  | On SCGS V1 list                                                                    | ENSG00000127824 |
| TUBB2A  | On SCGS V1 list                                                                    | ENSG00000137267 |
| TUBB2B  | On SCGS V1 list                                                                    | ENSG00000137285 |
| TUBB3   | On SCGS V1 list                                                                    | ENSG00000258947 |
| TUBB8   | Ciliopathy candidate identified through local research team experimental screen(s) | ENSG00000261456 |
| TUBE1   | On SCGS V1 list                                                                    | ENSG00000074935 |
| TUBGCP2 | On SCGS V1 list                                                                    | ENSG00000130640 |
| TUBGCP3 | On SCGS V1 list                                                                    | ENSG00000126216 |
| TUBGCP4 | On SCGS V1 list                                                                    | ENSG00000137822 |
| TUBGCP5 | On SCGS V1 list                                                                    | ENSG00000275835 |
| TUBGCP6 | On SCGS V1 list                                                                    | ENSG00000128159 |
| TULP1   | PanelApp RMCD red gene + SCGS V1 list                                              | ENSG00000112041 |
| TULP3   | On SCGS V1 list                                                                    | ENSG00000078246 |
| ULK4    | On SCGS V1 list                                                                    | ENSG00000168038 |
| UMOD    | PanelApp RMCD red gene                                                             | ENSG00000169344 |
| USH1C   | PanelApp RMCD red gene + SCGS V1 list                                              | ENSG00000006611 |
| USH1G   | PanelApp RMCD red gene + SCGS V1 list                                              | ENSG00000182040 |
| USH2A   | PanelApp RMCD red gene + SCGS V1 list                                              | ENSG00000042781 |
| VANGL2  | On SCGS V1 list                                                                    | ENSG00000162738 |
| VDAC3   | On SCGS V1 list                                                                    | ENSG00000078668 |
| VHL     | PanelApp RMCD red gene + SCGS V1 list                                              | ENSG00000134086 |
| WDR63   | PanelApp RMCD red gene                                                             | ENSG00000162643 |
| WDR78   | On SCGS V1 list                                                                    | ENSG00000152763 |
| WHRN    | PanelApp RMCD red gene + SCGS V1 list                                              | ENSG00000095397 |
| XPNPEP3 | PanelApp RMCD red gene + SCGS V1 list                                              | ENSG00000196236 |
| ZIC3    | PanelApp RMCD red gene                                                             | ENSG00000156925 |
| ZMYND10 | PanelApp RMCD red gene                                                             | ENSG00000004838 |

|        |                                         |                 |
|--------|-----------------------------------------|-----------------|
| ZNF423 | PanelApp RMCD amber gene + SCGS V1 list | ENSG00000102935 |
|--------|-----------------------------------------|-----------------|

Abbreviations: RMCD = Rare multisystem Ciliopathy disorders, SCGS V1 = SYSCILIA gold standard list version 1

Supplementary Table 4. Detailed variant information for all variants identified amongst participants of the congenital malformations caused by ciliopathies cohort with research identified diagnoses.

| Proband research number | Gene symbol | HGVSc                         | HGVSp                             | Segregation | Zygoty (presumed where segregation data unk) | Mutational mechanism | SIFT      | PolyPhen         | 1000G AF | gnomAD AF  | ClinVar        | PMID                                             | CADD Phred | SpliceAI max DS | Match for phenotype | Variant ACMG class |
|-------------------------|-------------|-------------------------------|-----------------------------------|-------------|----------------------------------------------|----------------------|-----------|------------------|----------|------------|----------------|--------------------------------------------------|------------|-----------------|---------------------|--------------------|
| 1                       | CHD7        | NM_017780.4:c.6955C>T         | NP_060250.2:p.Arg2319Cys          | De Novo     | Het                                          | Mis                  | Delet (0) | Prob_dam (0.99)  | -        | -          | Path           | 16400610                                         | 27.1       |                 | Full                | 5                  |
| 2                       | ALMS1       | NM_001378454.1:c.10772del     | NP_001365383.1:p.Thr3591LysfsTer6 | Pat         | Comp het                                     | SG                   | -         | -                | -        | 0.00005227 | Path           | 11941369, 11941370, 17594715                     | 23         |                 | Full                | 5                  |
| 2                       | ALMS1       | NM_001378454.1:c.11104C>T     | NP_001365383.1:p.Arg3702Ter       | Mat         | Comp het                                     | SG                   | -         | -                | -        | 0.00001205 | Path           | -                                                | 34         |                 | Full                | 5                  |
| 3                       | ARL6        | NM_001278293.3:c.534A>G       | NP_001265222.1:p.Gln178=          | Bi-parental | Hom                                          | Syn                  | -         | -                | -        | 0.00000796 | -              | 27708425                                         | 24.1       | DS_DL 0.87      | Full                | 5                  |
| 3                       | IMPG2       | NM_016247.4:c.3262C>T         | NP_057331.2:p.Arg1088Ter          | Bi-parental | Hom                                          | SG                   | -         | -                | 0.0002   | 0.0000358  | Path, Lik_Path | -                                                | 42         |                 | Partial             | 4                  |
| 4                       | RPGR        | NM_000328.3:c.1627del         | NP_000319.1:p.Asp5431lefsTer11    | Unk         | XLR                                          | FS, male             | -         | -                | -        | -          | -              | -                                                | -          |                 | Partial             | 4                  |
| 5                       | CEP290      | NM_025114.4:c.5668G>T         | NP_079390.3:p.Gly1890Ter          | Unk         | Comp het                                     | SG                   | -         | -                | 0.0002   | 0.00009486 | Path           | 18414213, 26092869, 16682970, 16682973, 17564967 | 35         |                 | Full                | 5                  |
| 5                       | CEP290      | NM_025114.4:c.322C>T          | NP_079390.3:p.Arg108Ter           | Unk         | Comp het                                     | SG                   | -         | -                | -        | 0.00000402 | Path           | -                                                | 35         |                 | Full                | 5                  |
| 6                       | KIAA0586    | NM_001329943.3:c.392del       | NP_001316872.1:p.Arg1311LysfsTer4 | Pat         | Comp het                                     | FS                   | -         | -                | 0.0024   | 0.00305    | Path, Lik_Path | 25741868, 26096313, 28552196, 26386247           | 33         |                 | Full                | 5                  |
| 6                       | KIAA0586    | NM_001329943.3:c.1402_1408del | NP_001316872.1:p.Pro4681lefsTer15 | Mat         | Comp het                                     | FS                   | -         | -                | -        | -          | -              | -                                                | -          |                 | Full                | 5                  |
| 7                       | CRYBB1      | NM_001887.4:c.193G>A          | NP_001878.1:p.Glu65Lys            | Unk         | Het                                          | Mis                  | Delet (0) | Prob_dam (0.979) | -        | -          | -              | -                                                | 29.2       |                 | Partial             | 3                  |
| 7                       | OFD1        | NM_003611.3:c.306del          | NP_003602.1:p.Glu103LysfsTer42    | Unk         | XLD                                          | FS, female           | -         | -                | -        | -          | -              | -                                                | -          |                 | Full                | 4                  |

|    |        |                                       |                                                |             |          |       |                              |                     |        |                 |                   |                                   |       |            |         |   |
|----|--------|---------------------------------------|------------------------------------------------|-------------|----------|-------|------------------------------|---------------------|--------|-----------------|-------------------|-----------------------------------|-------|------------|---------|---|
| 7  | PKD1   | NM_001009<br>944.3:c.5890<br>C>T      | NP_00100<br>9944.3:p.A<br>rg1964Cys            | Unk         | Het      | Mis   | Delet<br>(0.03)              | poss_dam<br>(0.772) | -      | 0.00001316      | -                 | -                                 | 25.5  |            | Partial | 3 |
| 8  | PRPF8  | NM_006445.<br>4:c.5804G>A             | NP_00643<br>6.3:p.Arg1<br>935His               | De Novo     | Het      | Mis   | Delet<br>(0)                 | Prob_dam<br>(1)     | -      | -               | Path,<br>Lik_Path | -                                 | 28.3  |            | Full    | 4 |
| 9  | CEP152 | NM_001194<br>998.2:c.2041<br>C>T      | NP_00118<br>1927.1:p.H<br>is681Tyr             | Pat         | Comp het | Mis   | Delet<br>(0)                 | Prob_dam<br>(0.999) | 0.0002 | 0.0001603       | VUS               | -                                 | 25.1  |            | Partial | 3 |
| 9  | CEP152 | NM_001194<br>998.2:c.1499<br>A>T      | NP_00118<br>1927.1:p.G<br>lu500Val             | Mat         | Comp het | Mis   | Delet<br>(0.01)              | Ben (0.159)         | 0.0002 | -               | -                 | -                                 | 23.2  |            | Partial | 3 |
| 10 | CEP290 | NM_025114.<br>4:c.5932C>T             | NP_07939<br>0.3:p.Arg1<br>978Ter               | Bi-parental | Hom      | SG    | -                            | -                   | -      | 0.00001212      | Path              | 26092869                          | 42    |            | Full    | 5 |
| 11 | MYCN   | NM_005378.<br>6:c.1006del             | NP_00536<br>9.2:p.Ser3<br>36LeufsTer<br>15     | De Novo     | Het      | FS    | -                            | -                   | -      | -               | -                 | -                                 | -     |            | Full    | 5 |
| 12 | ARMC9  | NM_001271<br>466.4:c.879<br>G>A       | NP_00125<br>8395.2:p.T<br>hr293=               | Bi-parental | Hom      | Syn   | -                            | -                   | -      | 0.00000806<br>5 | Path,<br>Lik_Path | 29159890,<br>17576681,<br>9536098 | 26.8  | DS_DL 0.9  | Full    | 5 |
| 13 | TUBA1A | NM_006009.<br>4:c.641G>T              | NP_00600<br>0.2:p.Arg2<br>14Leu                | De Novo     | Het      | Mis   | Delet_l<br>ow conf<br>(0.03) | Ben (0.023)         | -      | -               | Path,<br>Lik_Path | 25741868                          | 23.5  |            | Poor    | 5 |
| 14 | WDR19  | NM_025132.<br>4:c.1630_16<br>39del    | NP_07940<br>8.3:p.Val5<br>44LeufsTer<br>72     | Mat         | Comp het | Spl A | -                            | -                   | -      | -               | -                 | -                                 | -     |            | Full    | 5 |
| 14 | WDR19  | NM_025132.<br>4:c.817A>G              | NP_07940<br>8.3:p.Asn2<br>73Asp                | Pat         | Comp het | Mis   | Tol<br>(0.28)                | Ben (0.003)         | -      | 0.00001629      | VUS, Path         | 29068549                          | 14.46 |            | Full    | 5 |
| 15 | RHO    | NM_000539.<br>3:c.133T>C              | NP_00053<br>0.1:p.Phe4<br>5Leu                 | Unk         | Het      | Mis   | Tol<br>(0.53)                | Prob_dam<br>(0.979) | 0.0002 | 0.00002386      | Path              | 1862076                           | 23.6  |            | Full    | 5 |
| 16 | STAG1  | NM_005862.<br>3:c.1033G>A             | NP_00585<br>3.2:p.Glu3<br>45Lys                | De Novo     | Het      | Mis   | Delet<br>(0)                 | Prob_dam<br>(0.954) | -      | -               | -                 | -                                 | 28.6  |            | Full    | 3 |
| 17 | BBS1   | NM_024649.<br>5:c.1169T>G             | NP_07892<br>5.3:p.Met3<br>90Arg                | Bi-parental | Hom      | Mis   | Delet<br>(0)                 | Ben (0.347)         | 0.001  | 0.001512        | Path,<br>Lik_Path | 15 PMIDs                          | 26.2  |            | Full    | 5 |
| 18 | RERE   | NM_001042<br>681.2:c.4286<br>A>T      | NP_00103<br>6146.1:p.H<br>is1429Leu            | De Novo     | Het      | Mis   | Delet_l<br>ow conf<br>(0)    | Prob_dam<br>(0.936) | -      | -               | -                 | -                                 | 28    |            | Full    | 4 |
| 19 | ALMS1  | NM_001378<br>454.1:c.4681<br>_4687dup | NP_00136<br>5383.1:p.II<br>e1563Asnf<br>sTer20 | Bi-parental | Hom      | FS    | -                            | -                   | -      | -               | -                 | -                                 | -     |            | Full    | 5 |
| 20 | BBS2   | NM_031885.<br>5:c.471+1G><br>C        |                                                | Unk         | Comp het | Spl d | -                            | -                   | -      | -               | -                 | -                                 | 33    | DS_DL 0.95 | Full    | 4 |
| 20 | BBS2   | NM_031885.<br>5:c.646C>T              | NP_11409<br>1.4:p.Arg2<br>16Ter                | Unk         | Comp het | SG    | -                            | -                   | -      | 0.00001194      | Path,<br>Lik_Path | 11567139                          | 37    |            | Full    | 4 |

|    |        |                                                                     |                                       |                                         |          |          |              |                     |        |             |                           |                                                              |      |  |                |                |
|----|--------|---------------------------------------------------------------------|---------------------------------------|-----------------------------------------|----------|----------|--------------|---------------------|--------|-------------|---------------------------|--------------------------------------------------------------|------|--|----------------|----------------|
| 21 | KAT6A  | NM_006766.<br>5:c.1121C>T                                           | NP_006775.<br>7.2:p.Ser374Leu         | Unk                                     | Het      | Mis      | Delet<br>(0) | Prob_dam<br>(0.966) | -      | 0.00006369  | -                         | -                                                            | 28.4 |  | Partial        | 3              |
| 21 | LAMA1  | NM_005559.<br>4:c.3397C>T                                           | NP_005555.<br>0.2:p.Arg1133Ter        | Unk                                     | Comp het | SG       | -            | -                   | -      | 0.00001997  | Path                      | -                                                            | 38   |  | Full           | 4              |
| 21 | LAMA1  | NM_005559.<br>4:c.281A>G                                            | NP_005555.<br>0.2:p.Gln94Arg          | Unk                                     | Comp het | Mis      | Delet<br>(0) | Prob_dam<br>(1)     | -      | -           | -                         | -                                                            | 26.4 |  | Full           | 3              |
| 22 | MKKS   | NM_170784.<br>2:c.1017_1018del                                      | NP_740775.<br>4.1:p.Ile339MetfsTer3   | Bi-parental                             | Hom      | FS       | -            | -                   | -      | -           | -                         | -                                                            | -    |  | Full           | 5              |
| 23 | CEP290 | NM_025114.<br>4:c.5668G>T                                           | NP_079399.<br>0.3:p.Gly1890Ter        | Pat                                     | Comp het | SG       | -            | -                   | 0.0002 | 0.00009486  | Path                      | 18414213,<br>26092869,<br>16682970,<br>16682973,<br>17564967 | 36   |  | Full           | 5              |
| 23 | CEP290 | NM_025114.<br>4:c.104T>G                                            | NP_079399.<br>0.3:p.Val35Gly          | Mat                                     | Comp het | Mis      | Delet<br>(0) | Prob_dam<br>(0.943) | -      | -           | -                         | -                                                            | 33   |  | Full           | 3              |
| 25 | RAI1   | NM_030665.<br>4:c.2479C>T                                           | NP_109599.<br>0.3:p.Gln827Ter         | De Novo                                 | Het      | SG       | -            | -                   | -      | -           | -                         | -                                                            | 35   |  | Full           | 5              |
| 26 | PROM1  | NM_006017.<br>3:c.1354dup                                           | NP_006000.<br>8.1:p.Tyr452LeufsTer13  | Unk                                     | Hom      | FS       | -            | -                   | -      | 0.0002195   | Path,<br>Lik_Path         | -                                                            | 32   |  | Full           | 5              |
| 27 | SETD2  | NM_014159.<br>7:c.5218C>T                                           | NP_054877.<br>8.5:p.Arg1740Trp        | 1 parent's<br>unk, absent<br>from other | Het      | Mis      | Delet<br>(0) | Prob_dam<br>(0.998) | -      | -           | Path,<br>Lik_Path,<br>VUS | -                                                            | 32   |  | Full           | 5              |
| 28 | OPA1   | NM_130837.<br>3:c.2678del                                           | NP_570850.<br>0.2:p.His893LeufsTer9   | 1 parent's<br>unk, absent<br>from other | Het      | FS       | -            | -                   | -      | -           | -                         | -                                                            | -    |  | Partial        | 5              |
| 29 | ALMS1  | NM_015120.<br>4:c.11881dup                                          | NP_055933.<br>5.4:p.Ser3961PhefsTer12 | Unk                                     | Comp het | FS       | -            | -                   | -      | -           | -                         | -                                                            | -    |  | Full           | 5              |
| 29 | ALMS1  | NM_015120.<br>4:c.1241-81_1252delinsCCTGCAGGCCCTCCACATATGCTACAAAATA | -                                     | Unk                                     | Comp het | Spl A    | -            | -                   | -      | -           | -                         | -                                                            | -    |  | Full           | 4              |
| 30 | PHIP   | NM_017934.<br>7:c.3202delAinsTACCTG                                 | NP_060404.<br>4.4:p.Ile1068AsnfsTer3  | Unk                                     | Het      | FS       | -            | -                   | -      | -           | -                         | -                                                            | -    |  | Full           | 5              |
| 31 | RAB28  | NM_001017.<br>979.3:c.58dup                                         | NP_001017.<br>799.1:p.Asp20GlyfsTer62 | Unk                                     | Hom      | FS       | -            | -                   | -      | 0.000004504 | -                         | -                                                            | 33   |  | Full           | 5              |
| 32 | ALMS1  | GMC<br>questionnaire reports                                        |                                       | Unk                                     | Comp het | Exon del | -            | -                   | -      | -           | -                         | -                                                            | -    |  | False positive | False positive |



|    |        |                                      |                               |                                   |          |                              |                       |                  |       |             |                |          |       |            |                |                |
|----|--------|--------------------------------------|-------------------------------|-----------------------------------|----------|------------------------------|-----------------------|------------------|-------|-------------|----------------|----------|-------|------------|----------------|----------------|
|    |        | exon 11<br>Deletion                  |                               |                                   |          |                              |                       |                  |       |             |                |          |       |            |                |                |
| 32 | ALMS1  | NM_015120.4:c.9001C>T                | NP_055935.4:p.Gln3001Ter      | Unk                               | Comp het | SG                           | -                     | -                | -     | 0.000004008 | -              | -        | 36    |            | Full           | 5              |
| 34 | POLA1  | NM_001330360.2:c.460G>T              | NP_001317289.1:p.Asp154Tyr    | Mat                               | XLR      | Mis, male                    | Delet (0)             | Prob_dam (0.935) | -     | 0.0001049   | -              | -        | 32    |            | Partial        | 3              |
| 41 | CSPP1  | NM_001382391.1:c.2968+5G>A           |                               | Mat                               | Comp het | Spl region                   | -                     | -                | -     | -           | VUS            | -        | -     | DS_DL 0.79 | Full           | 3              |
| 41 | CSPP1  | GrCh38: Chr8:67136672_67139048del    |                               | Pat                               | Comp het | 2.7kb del incl exon 15       |                       |                  |       |             |                |          |       |            | Full           | 5              |
| 42 | PIBF1  | NM_006346.4:c.1205T>C                | NP_006337.2:p.Met402Thr       | Unk                               | Comp het | Mis                          | Tol (0.09)            | Ben (0.157)      | -     | -           | -              | -        | 22.8  |            | Full           | 3              |
| 42 | PIBF1  | GrCh38: chr13:g.72783352_72796671del |                               | Unk                               | Comp het | 13.3kb del incl exons 2-4    |                       |                  |       |             |                |          |       |            | Full           | 5              |
| 48 | LRRC45 | NM_144999.4:c.1074_1075insTG         | NP_659436.1:p.Leu59CysfsTer19 | Bi-parental                       | Hom      | FS                           | -                     | -                | -     | -           | -              | -        | -     |            | Candidate gene | Candidate gene |
| 56 | BBS9   | NM_198428.3:c.1028G>A                | NP_940820.1:p.Gly343Glu       | 1 parent's unk, present in other  | Hom      | Mis                          | Delet (0)             | Prob_dam (1)     | -     | -           | -              | -        | 25.9  |            | Full           | 3              |
| 61 | WT1    | NM_024426.6:c.1400G>A                | NP_077744.4:p.Arg467Gln       | Unk                               | Het      | Mis                          | Delet_low conf (0.02) | Poss_dam (0.767) | -     | -           | Path           | 1302008  | 29.9  |            | Full           | 5              |
| 67 | ALMS1  | NM_015120.4:c.1612C>G                | NP_055935.4:p.Leu538Val       | Pat                               | Comp het | Mis                          | Tol_low conf (0.17)   | Ben (0.009)      | -     | 0.0003289   | lik_ben, VUS   | -        | 0.003 |            | Full           | 3              |
| 67 | ALMS1  | NM_015120.4:c.9613A>G                | NP_055935.4:p.Ile3205Val      | Mat                               | Comp het | Mis                          | Delet (0.03)          | Prob_dam (0.997) | -     | 0.000008021 | VUS            | -        | 23    |            | Full           | 3              |
| 69 | BBS1   | NM_024649.5:c.1169T>G                | NP_078925.3:p.Met390Arg       | Mat                               | Comp het | Mis                          | Delet (0)             | Ben (0.347)      | 0.001 | 0.001512    | Path, Lik_Path | 15 PMIDs | 26.2  |            | Full           | 5              |
| 69 | BBS1   | NM_024649.5:c.592-1333_831-449del    |                               | Pat                               | Comp het | 4.7kb del incl exons 8 and 9 |                       |                  |       |             |                |          |       |            | Full           | 5              |
| 71 | BCORL1 | NM_001379451.1:c.3463C>A             | NP_001366380.1:p.Pro1155Thr   | Mat                               | XLR      | Mis, male                    | Tol (0.12)            | Poss_dam (0.557) | -     | 0.00003468  | -              | -        | 21.2  |            | Partial        | 3              |
| 72 | CHD4   | NM_001273.5:c.3225G>T                | NP_001264.2:p.Met1075Ile      | 1 parent's unk, absent from other | Het      | Mis                          | Delet (0)             | Ben (0.358)      | -     | -           | -              | -        | 26    |            | Full           | 3              |
| 75 | BBS4   | NM_033028.5:c.642+3A>T               |                               | 1 parent's unk, present in other  | Hom      | Spl region                   | -                     | -                | -     | -           | -              | -        | 22.5  | DS_DL 0.82 | Data missing   | 3              |

|    |              |                       |                          |                                  |          |     |              |                  |   |            |      |                   |       |  |      |   |
|----|--------------|-----------------------|--------------------------|----------------------------------|----------|-----|--------------|------------------|---|------------|------|-------------------|-------|--|------|---|
| 76 | <i>BBS10</i> | NM_024685.4:c.1790G>A | NP_07896.1.3:p.Gly597Asp | 1 parent's unk, present in other | Hom      | Mis | Delet (0)    | Prob_dam (0.999) | - | -          | -    | -                 | 25.8  |  | Full | 3 |
| 82 | <i>IDUA</i>  | NM_000203.5:c.1469T>C | NP_00019.4.2:p.Leu490Pro | Unk                              | Comp het | Mis | Delet (0.02) | Ben (0.086)      | - | 0.00004681 | Path | 23757202, 7550232 | 18.91 |  | Full | 5 |
| 82 | <i>IDUA</i>  | NM_000203.5:c.406G>A  | NP_00019.4.2:p.Ala136Thr | Unk                              | Comp het | Mis | Delet (0.01) | Ben (0.085)      | - | 0.0001039  | VUS  | -                 | 20.7  |  | Full | 3 |

Variants are described using Human Genome Variation Society (HGVS) nomenclature with the RefSeq transcript selected (or longest transcript if RefSeq not available). They are accompanied by the GEL tier, zygosity (presumed where segregation data unavailable), mutational mechanism, ACMG classification, match to phenotype and assigned diagnostic confidence.

**Abbreviations:** mat = maternal, pat = paternal, unk = unknown, AF = allele frequency, het = heterozygous, comp het = compound heterozygous, XLR = X-linked recessive, XLD = X-linked dominant, hom = homozygous, spl = splice, Spl D = splice donor, Spl A = splice acceptor, Syn = synonymous, SG = stop gain, FS = frameshift, del = deletion, kb = kilobase, low\_conf = low confidence, Tol = Tolerated, delet = deleterious, Prob\_dam = probably damaging, ben = benign, poss\_dam = possibly damaging, incl = including, Path = Pathogenic, Lik\_Path = likely Pathogenic, VUS = variant of uncertain significance, lik\_ben = likely benign, PMID = PubMed identifier, CADD = Combined Annotation Dependent Depletion (CADD), DS = delta score, DS\_DL = delta score donor loss,

**ACMG classifications:** Class 5 = pathogenic, Class 4 = likely pathogenic, Class 3 = VUS

## References

1. Gee HY, Otto EA, Hurd TW, Ashraf S, Chaki M, Cluckey A, et al. Whole-exome resequencing distinguishes cystic kidney diseases from phenocopies in renal ciliopathies. *Kidney Int.* 2014;85(4):880-7.
2. Knopp C, Rudnik-Schoneborn S, Eggermann T, Bergmann C, Begemann M, Schoner K, et al. Syndromic ciliopathies: From single gene to multi gene analysis by SNP arrays and next generation sequencing. *Molecular and cellular probes.* 2015;29(5):299-307.
3. Bachmann-Gagescu R, Dempsey JC, Phelps IG, O'Roak BJ, Knutzen DM, Rue TC, et al. Joubert syndrome: a model for untangling recessive disorders with extreme genetic heterogeneity. *Journal of medical genetics.* 2015;52(8):514-22.
4. Sawyer SL, Hartley T, Dymont DA, Beaulieu CL, Schwartzentruber J, Smith A, et al. Utility of whole-exome sequencing for those near the end of the diagnostic odyssey: time to address gaps in care. *Clinical genetics.* 2016;89(3):275-84.
5. Braun DA, Schueler M, Halbritter J, Gee HY, Porath JD, Lawson JA, et al. Whole exome sequencing identifies causative mutations in the majority of consanguineous or familial cases with childhood-onset increased renal echogenicity. *Kidney Int.* 2016;89(2):468-75.
6. Kang HG, Lee HK, Ahn YH, Joung JG, Nam J, Kim NK, et al. Targeted exome sequencing resolves allelic and the genetic heterogeneity in the genetic diagnosis of nephronophthisis-related Ciliopathy. *Exp Mol Med.* 2016;48(8):e251.
7. Watson CM, Crinnion LA, Berry IR, Harrison SM, Lascelles C, Antanaviciute A, et al. Enhanced diagnostic yield in Meckel-Gruber and Joubert syndrome through exome sequencing supplemented with split-read mapping. *BMC Medical Genetics.* 2016;17(1):1.
8. Castro-Sánchez S, Álvarez-Satta M, Tohamy MA, Beltran S, Derdak S, Valverde D. Whole exome sequencing as a diagnostic tool for patients with Ciliopathy-like phenotypes. *PLoS One.* 2017;12(8):e0183081.
9. Vilboux T, Doherty DA, Glass IA, Parisi MA, Phelps IG, Cullinane AR, et al. Molecular genetic findings and clinical correlations in 100 patients with Joubert syndrome and related disorders prospectively evaluated at a single center. *Genet Med.* 2017;19(8):875-82.
10. Shamseldin HE, Al Mogarri I, Alqwaiee MM, Alharbi AS, Baqais K, AlSaadi M, et al. An exome-first approach to aid in the diagnosis of primary ciliary dyskinesia. *Hum Genet.* 2020;139(10):1273-83.
11. Shamseldin HE, Shaheen R, Ewida N, Bubshait DK, Alkuraya H, Almardawi E, et al. The morbid genome of ciliopathies: an update. *Genet Med.* 2020.
12. Hammarsjö A, Pettersson M, Chitayat D, Handa A, Anderlid BM, Bartocci M, et al. High diagnostic yield in skeletal ciliopathies using massively parallel genome sequencing, structural variant screening and RNA analyses. *J Hum Genet.* 2021.
13. Forsythe E, Beales PL. Bardet-Biedl syndrome. *European journal of human genetics : EJHG.* 2013;21(1):8-13.
14. Bachmann-Gagescu R, Dempsey JC, Bulgheroni S, Chen ML, D'Arrigo S, Glass IA, et al. Healthcare recommendations for Joubert syndrome. *Am J Med Genet A.* 2020;182(1):229-49.
15. Hartill V, Szymanska K, Sharif SM, Wheway G, Johnson CA. Meckel-Gruber Syndrome: An Update on Diagnosis, Clinical Management, and Research Advances. *Front Pediatr.* 2017;5(244).
16. Quinlan RJ, Tobin JL, Beales PL. Modeling ciliopathies: Primary cilia in development and disease. *Curr Top Dev Biol.* 2008;84:249-310.
